# Supplementary material
Source: publisher figshare collection journal article supplement (https://acs.figshare.com/ndownloader/files/4187368)
Supplement: Supplementary file 1 [file 4187368]

#============================================================================== 

data_New_Global_Publ_Block

_publ_section_related_literature ?

# Added by publCIF - use a unique identifier for each data block

#==============================================================================


# SUBMISSION DETAILS

_publ_contact_author_name            
'Naohito Tsujii'   # Name of author for correspondence
_publ_contact_author_address             # Address of author for correspondence

;
National Institute for Materials Science, Sengen 1-2-1, Tsukuba 305-0047, Japan
;

_publ_contact_author_email           
'tsujii.naohito@nims.go.jp, smkauzlarich@ucdavis.edu'
_publ_contact_author_fax             ?
_publ_contact_author_phone           ?

_publ_contact_letter
;
Please consider this CIF for publication. I certify that this contibution is the
original work of those listed as authors; that it has not been published
before (in any language or medium) and is not being considered for publication
elsewhere; that all authors concur with and are aware of the submission; that
all workers involved in the study are listed as authors or given proper credit
in the acknowledgements; that I have obtained permission for and acknowledged
the source of any excerpts from other copyright works; and that to the best of
my knowledge the paper contains no statements which are libellous, unlawful or
in any way actionable. All coauthors have made significant scientific
contributions to the work reported, including the ideas and their execution,
and share responsibility and accountability for the results.
;
   
_publ_requested_journal              'Inorganic Chemistry'
_publ_requested_category             ?   

#==============================================================================

# TITLE AND AUTHOR LIST

_publ_section_title
;
Crystal structure and giant magnetoresistance effect in a new Zintl compound
Eu3Ga2P4
;
_publ_section_title_footnote  # remove if not required
.         
 
# The loop structure below should contain the names and addresses of all 
# authors, in the required order of publication. Repeat as necessary.

# NB if using publCIF, the Author database tool might prove useful
# (see the Tools menu in publCIF)

loop_
_publ_author_name
_publ_author_address
_publ_author_footnote
_publ_author_email
'Tsujii, Naohito'
;
National Institute for Materials Science, Sengen 1-2-1, Tsukuba 305-0047, Japan
;
.
;
tsujii.naohito@nims.go.jp
;
'Cox-Uvarov, Catherine A.'
;
Department of Chemistry, University of California, Davis, One Shields Avenue,
Davis, California 95616.
;
.
.
'Klavins, Peter'
;
Department of Physics, University of California, Davis, One Shields Avenue,
Davis, California 95616.
;
.
.
'Yi, Tanghong'
;
Department of Chemistry, University of California, Davis, One Shields Avenue,
Davis, California 95616.
;
.
.
'Kauzlarich, Susan M.'
;
Department of Chemistry, University of California, Davis, One Shields Avenue,
Davis, California 95616.
;
.
;
smkauzlarich@ucdavis.edu
;


#==============================================================================

# TEXT

_publ_section_synopsis
;
?
;
_publ_section_abstract
;
(type here to add abstract)
;
_publ_section_comment
;
(type here to add)
;
_publ_section_acknowledgements 	# remove if not required
;
?
;
_publ_section_references
;
?
;
_publ_section_figure_captions
;
?
;
_publ_section_exptl_prep
;
?
;
_publ_section_exptl_refinement
;
?
;
#==============================================================================


 
data_n090114a 

_audit_update_record
;
2012-01-18 # Formatted by publCIF
;
 
_audit_creation_method            SHELXL-97 
_chemical_name_systematic 
? 
_chemical_name_common             Eu3Ga2P4 
_chemical_melting_point           ? 
_chemical_formula_moiety          'Eu3 Ga2 P4' 
_chemical_formula_sum 
 'Eu3 Ga2 P4' 
_chemical_formula_weight          719.20 
 
loop_ 
 _atom_type_symbol 
 _atom_type_description 
 _atom_type_scat_dispersion_real 
 _atom_type_scat_dispersion_imag 
 _atom_type_scat_source 
 'P'  'P'   0.1023   0.0942 
 'International Tables Vol C Tables 4.2.6.8 and 6.1.1.4' 
 'Ga'  'Ga'   0.2307   1.6083 
 'International Tables Vol C Tables 4.2.6.8 and 6.1.1.4' 
 'Eu'  'Eu'  -0.1578   3.6682 
 'International Tables Vol C Tables 4.2.6.8 and 6.1.1.4' 
 
_symmetry_cell_setting            monoclinic 
_symmetry_space_group_name_H-M    'C 2/c'
_symmetry_space_group_name_Hall   '-C 2yc'
 
loop_ 
 _symmetry_equiv_pos_as_xyz 
 'x, y, z' 
 '-x, y, -z+1/2' 
 'x+1/2, y+1/2, z' 
 '-x+1/2, y+1/2, -z+1/2' 
 '-x, -y, -z' 
 'x, -y, z-1/2' 
 '-x+1/2, -y+1/2, -z' 
 'x+1/2, -y+1/2, z-1/2' 
 
_cell_length_a                    13.0245(12) 
_cell_length_b                    10.1167(10) 
_cell_length_c                    6.5580(6) 
_cell_angle_alpha                 90.00 
_cell_angle_beta                  90.2430(10) 
_cell_angle_gamma                 90.00 
_cell_volume                      864.11(14) 
_cell_formula_units_Z             4 
_cell_measurement_temperature     90(2) 
_cell_measurement_reflns_used    2675
_cell_measurement_theta_min        4.03
_cell_measurement_theta_max       30.84
 
_exptl_crystal_description        'Flake' 
_exptl_crystal_colour             'Metallic-Grey'
_exptl_crystal_size_max           0.06 
_exptl_crystal_size_mid           0.05 
_exptl_crystal_size_min           0.02 
_exptl_crystal_density_meas       ? 
_exptl_crystal_density_diffrn     5.528 
_exptl_crystal_density_method     'not measured' 
_exptl_crystal_F_000              1244 
_exptl_absorpt_coefficient_mu     28.256 
_exptl_absorpt_correction_type    multi-scan 
_exptl_absorpt_correction_T_min   0.2733 
_exptl_absorpt_correction_T_max   0.5626 
_exptl_absorpt_process_details    'SADABS 2.1 (Sheldrick, 2003)' 
 
_exptl_special_details 
? 
 
_diffrn_ambient_temperature       90(2) 
_diffrn_radiation_wavelength      0.71073 
_diffrn_radiation_type            MoK\a 
_diffrn_radiation_source          'fine-focus sealed tube' 
_diffrn_radiation_monochromator   graphite 
_diffrn_measurement_device_type   SMART1000
_diffrn_measurement_method        ? 
_diffrn_detector_area_resol_mean  ? 
_diffrn_reflns_number             4663 
_diffrn_reflns_av_R_equivalents   0.0194 
_diffrn_reflns_av_sigmaI/netI     0.0156 
_diffrn_reflns_limit_h_min        -16 
_diffrn_reflns_limit_h_max        16 
_diffrn_reflns_limit_k_min        -13 
_diffrn_reflns_limit_k_max        13 
_diffrn_reflns_limit_l_min        -8 
_diffrn_reflns_limit_l_max        8 
_diffrn_reflns_theta_min          2.55 
_diffrn_reflns_theta_max          27.50 
_reflns_number_total              1002 
_reflns_number_gt                 921 
_reflns_threshold_expression      >2sigma(I) 
 
_computing_data_collection      'Bruker Smart'
_computing_cell_refinement      'Bruker Saint'
_computing_data_reduction       'Bruker Saint'
_computing_structure_solution   'SHELXS-97 (Sheldrick, 1990)'
_computing_structure_refinement 'SHELXL-97 (Sheldrick, 1997)'
_computing_molecular_graphics   'Crystal Maker 7.1'
_computing_publication_material 'Bruker SHELXTL'
 
_refine_special_details 
; 
 Refinement of F^2^ against ALL reflections.  The weighted R-factor wR and 
 goodness of fit S are based on F^2^, conventional R-factors R are based 
 on F, with F set to zero for negative F^2^. The threshold expression of 
 F^2^ > 2sigma(F^2^) is used only for calculating R-factors(gt) etc. and is 
 not relevant to the choice of reflections for refinement.  R-factors based 
 on F^2^ are statistically about twice as large as those based on F, and R- 
 factors based on ALL data will be even larger. 
; 
 
_refine_ls_structure_factor_coef  Fsqd  
_refine_ls_matrix_type            full 
_refine_ls_weighting_scheme       calc  
_refine_ls_weighting_details 
 'calc w=1/[\s^2^(Fo^2^)+(0.0380P)^2^+1.1065P] where P=(Fo^2^+2Fc^2^)/3' 
_atom_sites_solution_primary      direct 
_atom_sites_solution_secondary    difmap 
_atom_sites_solution_hydrogens    . 
_refine_ls_hydrogen_treatment     . 
_refine_ls_extinction_method      SHELXL 
_refine_ls_extinction_coef        0.00036(6) 
_refine_ls_extinction_expression 
 'Fc^*^=kFc[1+0.001xFc^2^\l^3^/sin(2\q)]^-1/4^' 
_refine_ls_number_reflns          1002 
_refine_ls_number_parameters      43 
_refine_ls_number_restraints      0 
_refine_ls_R_factor_all           0.0245 
_refine_ls_R_factor_gt            0.0214 
_refine_ls_wR_factor_ref          0.0545 
_refine_ls_wR_factor_gt           0.0531 
_refine_ls_goodness_of_fit_ref    1.070 
_refine_ls_restrained_S_all       1.070 
_refine_ls_shift/su_max           0.000 
_refine_ls_shift/su_mean          0.000 
 
loop_ 
 _atom_site_label 
 _atom_site_type_symbol 
 _atom_site_fract_x 
 _atom_site_fract_y 
 _atom_site_fract_z 
 _atom_site_U_iso_or_equiv 
 _atom_site_adp_type 
 _atom_site_occupancy 
 _atom_site_symmetry_multiplicity 
 _atom_site_calc_flag 
 _atom_site_refinement_flags 
 _atom_site_disorder_assembly 
 _atom_site_disorder_group 
Eu1 Eu 0.37793(2) 0.12776(2) 0.03614(4) 0.00692(12) Uani 1 1 d . . . 
Eu2 Eu 0.0000 0.10022(4) 0.2500 0.00616(13) Uani 1 2 d S . . 
Ga1 Ga 0.29668(5) 0.37872(5) 0.41575(10) 0.00594(16) Uani 1 1 d . . . 
P1 P 0.11727(10) 0.32501(14) 0.4759(2) 0.0067(3) Uani 1 1 d . . . 
P2 P 0.34354(10) 0.41530(14) 0.0704(2) 0.0062(3) Uani 1 1 d . . . 
 
loop_ 
 _atom_site_aniso_label 
 _atom_site_aniso_U_11 
 _atom_site_aniso_U_22 
 _atom_site_aniso_U_33 
 _atom_site_aniso_U_23 
 _atom_site_aniso_U_13 
 _atom_site_aniso_U_12 
Eu1 0.00626(17) 0.00613(17) 0.00837(17) -0.00007(9) -0.00065(11) 0.00011(9) 
Eu2 0.00606(19) 0.0069(2) 0.0056(2) 0.000 -0.00030(14) 0.000 
Ga1 0.0066(3) 0.0060(3) 0.0053(3) -0.0002(2) -0.0001(2) -0.0001(2) 
P1 0.0062(6) 0.0068(7) 0.0070(7) -0.0003(5) -0.0010(5) -0.0001(5) 
P2 0.0059(7) 0.0077(7) 0.0051(7) 0.0002(5) 0.0001(5) 0.0003(5) 
 
_geom_special_details 
; 
 All esds (except the esd in the dihedral angle between two l.s. planes) 
 are estimated using the full covariance matrix.  The cell esds are taken 
 into account individually in the estimation of esds in distances, angles 
 and torsion angles; correlations between esds in cell parameters are only 
 used when they are defined by crystal symmetry.  An approximate (isotropic) 
 treatment of cell esds is used for estimating esds involving l.s. planes. 
; 
 
loop_ 
 _geom_bond_atom_site_label_1 
 _geom_bond_atom_site_label_2 
 _geom_bond_distance 
 _geom_bond_site_symmetry_2 
 _geom_bond_publ_flag 
Eu1 P2 2.9519(14) . ? 
Eu1 P2 2.9968(14) 7 ? 
Eu1 P1 3.0645(15) 4_545 ? 
Eu1 P1 3.1799(14) 8 ? 
Eu1 P1 3.2356(14) 7_556 ? 
Eu1 P1 3.3929(14) 7 ? 
Eu1 Ga1 3.4097(7) 4_545 ? 
Eu1 Eu2 3.6943(4) 7 ? 
Eu1 Ga1 3.7128(7) . ? 
Eu1 Ga1 3.7285(7) 7 ? 
Eu1 Eu1 4.1270(6) 5_655 ? 
Eu1 Eu1 4.1752(6) 7 ? 
Eu2 P2 2.9372(13) 8_456 ? 
Eu2 P2 2.9372(13) 7 ? 
Eu2 P2 3.0033(14) 3_445 ? 
Eu2 P2 3.0033(14) 4_545 ? 
Eu2 P1 3.1114(14) . ? 
Eu2 P1 3.1114(14) 2 ? 
Eu2 Ga1 3.4371(7) 7_556 ? 
Eu2 Ga1 3.4371(7) 8_455 ? 
Eu2 Ga1 3.6387(7) 3_445 ? 
Eu2 Ga1 3.6387(7) 4_545 ? 
Eu2 Eu1 3.6943(4) 8_456 ? 
Eu2 Eu1 3.6943(4) 7 ? 
Ga1 P2 2.3773(15) . ? 
Ga1 P2 2.3953(15) 6_566 ? 
Ga1 P1 2.4330(15) . ? 
Ga1 P1 2.4499(15) 7_556 ? 
Ga1 Eu1 3.4096(7) 4 ? 
Ga1 Eu2 3.4371(7) 7_556 ? 
Ga1 Eu2 3.6387(7) 3 ? 
Ga1 Eu1 3.7284(7) 7 ? 
P1 Ga1 2.4498(15) 7_556 ? 
P1 Eu1 3.0645(15) 4 ? 
P1 Eu1 3.1800(14) 8_456 ? 
P1 Eu1 3.2356(14) 7_556 ? 
P1 Eu1 3.3929(14) 7 ? 
P2 Ga1 2.3953(15) 6_565 ? 
P2 Eu2 2.9372(13) 7 ? 
P2 Eu1 2.9968(14) 7 ? 
P2 Eu2 3.0033(14) 3 ? 
 
loop_ 
 _geom_angle_atom_site_label_1 
 _geom_angle_atom_site_label_2 
 _geom_angle_atom_site_label_3 
 _geom_angle 
 _geom_angle_site_symmetry_1 
 _geom_angle_site_symmetry_3 
 _geom_angle_publ_flag 
P2 Eu1 P2 90.85(4) . 7 ? 
P2 Eu1 P1 171.89(4) . 4_545 ? 
P2 Eu1 P1 82.44(4) 7 4_545 ? 
P2 Eu1 P1 90.60(4) . 8 ? 
P2 Eu1 P1 159.39(4) 7 8 ? 
P1 Eu1 P1 97.28(3) 4_545 8 ? 
P2 Eu1 P1 77.39(4) . 7_556 ? 
P2 Eu1 P1 105.46(4) 7 7_556 ? 
P1 Eu1 P1 99.95(4) 4_545 7_556 ? 
P1 Eu1 P1 94.92(4) 8 7_556 ? 
P2 Eu1 P1 86.56(4) . 7 ? 
P2 Eu1 P1 79.14(3) 7 7 ? 
P1 Eu1 P1 96.59(4) 4_545 7 ? 
P1 Eu1 P1 80.43(4) 8 7 ? 
P1 Eu1 P1 163.27(5) 7_556 7 ? 
P2 Eu1 Ga1 128.29(3) . 4_545 ? 
P2 Eu1 Ga1 43.32(3) 7 4_545 ? 
P1 Eu1 Ga1 43.74(3) 4_545 4_545 ? 
P1 Eu1 Ga1 141.00(3) 8 4_545 ? 
P1 Eu1 Ga1 91.59(3) 7_556 4_545 ? 
P1 Eu1 Ga1 102.17(3) 7 4_545 ? 
P2 Eu1 Eu2 50.97(3) . 7 ? 
P2 Eu1 Eu2 113.94(3) 7 7 ? 
P1 Eu1 Eu2 136.26(3) 4_545 7 ? 
P1 Eu1 Eu2 53.19(3) 8 7 ? 
P1 Eu1 Eu2 112.69(3) 7_556 7 ? 
P1 Eu1 Eu2 51.87(2) 7 7 ? 
Ga1 Eu1 Eu2 152.389(13) 4_545 7 ? 
P2 Eu1 Ga1 39.77(3) . . ? 
P2 Eu1 Ga1 88.79(3) 7 . ? 
P1 Eu1 Ga1 134.97(3) 4_545 . ? 
P1 Eu1 Ga1 105.24(3) 8 . ? 
P1 Eu1 Ga1 40.56(3) 7_556 . ? 
P1 Eu1 Ga1 125.02(3) 7 . ? 
Ga1 Eu1 Ga1 104.546(11) 4_545 . ? 
Eu2 Eu1 Ga1 87.461(13) 7 . ? 
P2 Eu1 Ga1 89.17(3) . 7 ? 
P2 Eu1 Ga1 39.55(3) 7 7 ? 
P1 Eu1 Ga1 88.53(3) 4_545 7 ? 
P1 Eu1 Ga1 119.93(3) 8 7 ? 
P1 Eu1 Ga1 142.92(3) 7_556 7 ? 
P1 Eu1 Ga1 39.60(2) 7 7 ? 
Ga1 Eu1 Ga1 69.863(15) 4_545 7 ? 
Eu2 Eu1 Ga1 82.631(12) 7 7 ? 
Ga1 Eu1 Ga1 111.737(14) . 7 ? 
P2 Eu1 Eu1 138.00(3) . 5_655 ? 
P2 Eu1 Eu1 128.57(3) 7 5_655 ? 
P1 Eu1 Eu1 49.85(3) 4_545 5_655 ? 
P1 Eu1 Eu1 47.44(3) 8 5_655 ? 
P1 Eu1 Eu1 101.21(3) 7_556 5_655 ? 
P1 Eu1 Eu1 87.54(3) 7 5_655 ? 
Ga1 Eu1 Eu1 93.574(15) 4_545 5_655 ? 
Eu2 Eu1 Eu1 94.288(11) 7 5_655 ? 
Ga1 Eu1 Eu1 136.657(16) . 5_655 ? 
Ga1 Eu1 Eu1 111.431(14) 7 5_655 ? 
P2 Eu1 Eu1 45.86(3) . 7 ? 
P2 Eu1 Eu1 44.99(3) 7 7 ? 
P1 Eu1 Eu1 127.27(3) 4_545 7 ? 
P1 Eu1 Eu1 132.78(3) 8 7 ? 
P1 Eu1 Eu1 92.12(3) 7_556 7 ? 
P1 Eu1 Eu1 79.76(2) 7 7 ? 
Ga1 Eu1 Eu1 85.176(15) 4_545 7 ? 
Eu2 Eu1 Eu1 81.145(10) 7 7 ? 
Ga1 Eu1 Eu1 56.046(12) . 7 ? 
Ga1 Eu1 Eu1 55.691(11) 7 7 ? 
Eu1 Eu1 Eu1 166.652(16) 5_655 7 ? 
P2 Eu2 P2 173.87(6) 8_456 7 ? 
P2 Eu2 P2 77.03(4) 8_456 3_445 ? 
P2 Eu2 P2 99.08(3) 7 3_445 ? 
P2 Eu2 P2 99.08(3) 8_456 4_545 ? 
P2 Eu2 P2 77.03(4) 7 4_545 ? 
P2 Eu2 P2 102.94(5) 3_445 4_545 ? 
P2 Eu2 P1 92.24(4) 8_456 . ? 
P2 Eu2 P1 92.24(4) 7 . ? 
P2 Eu2 P1 166.65(4) 3_445 . ? 
P2 Eu2 P1 86.42(4) 4_545 . ? 
P2 Eu2 P1 92.24(4) 8_456 2 ? 
P2 Eu2 P1 92.24(4) 7 2 ? 
P2 Eu2 P1 86.42(4) 3_445 2 ? 
P2 Eu2 P1 166.65(4) 4_545 2 ? 
P1 Eu2 P1 86.07(5) . 2 ? 
P2 Eu2 Ga1 94.71(3) 8_456 7_556 ? 
P2 Eu2 Ga1 85.67(3) 7 7_556 ? 
P2 Eu2 Ga1 143.94(3) 3_445 7_556 ? 
P2 Eu2 Ga1 43.01(3) 4_545 7_556 ? 
P1 Eu2 Ga1 43.59(3) . 7_556 ? 
P1 Eu2 Ga1 129.32(3) 2 7_556 ? 
P2 Eu2 Ga1 85.67(3) 8_456 8_455 ? 
P2 Eu2 Ga1 94.71(3) 7 8_455 ? 
P2 Eu2 Ga1 43.01(3) 3_445 8_455 ? 
P2 Eu2 Ga1 143.94(3) 4_545 8_455 ? 
P1 Eu2 Ga1 129.33(3) . 8_455 ? 
P1 Eu2 Ga1 43.59(3) 2 8_455 ? 
Ga1 Eu2 Ga1 172.89(2) 7_556 8_455 ? 
P2 Eu2 Ga1 41.01(3) 8_456 3_445 ? 
P2 Eu2 Ga1 133.53(3) 7 3_445 ? 
P2 Eu2 Ga1 40.55(3) 3_445 3_445 ? 
P2 Eu2 Ga1 89.58(3) 4_545 3_445 ? 
P1 Eu2 Ga1 131.63(3) . 3_445 ? 
P1 Eu2 Ga1 103.65(3) 2 3_445 ? 
Ga1 Eu2 Ga1 114.040(13) 7_556 3_445 ? 
Ga1 Eu2 Ga1 70.670(15) 8_455 3_445 ? 
P2 Eu2 Ga1 133.53(3) 8_456 4_545 ? 
P2 Eu2 Ga1 41.01(3) 7 4_545 ? 
P2 Eu2 Ga1 89.58(3) 3_445 4_545 ? 
P2 Eu2 Ga1 40.55(3) 4_545 4_545 ? 
P1 Eu2 Ga1 103.65(3) . 4_545 ? 
P1 Eu2 Ga1 131.63(3) 2 4_545 ? 
Ga1 Eu2 Ga1 70.670(15) 7_556 4_545 ? 
Ga1 Eu2 Ga1 114.040(13) 8_455 4_545 ? 
Ga1 Eu2 Ga1 103.97(2) 3_445 4_545 ? 
P2 Eu2 Eu1 51.33(3) 8_456 8_456 ? 
P2 Eu2 Eu1 134.79(3) 7 8_456 ? 
P2 Eu2 Eu1 111.75(3) 3_445 8_456 ? 
P2 Eu2 Eu1 123.88(3) 4_545 8_456 ? 
P1 Eu2 Eu1 54.91(3) . 8_456 ? 
P1 Eu2 Eu1 59.07(3) 2 8_456 ? 
Ga1 Eu2 Eu1 87.820(13) 7_556 8_456 ? 
Ga1 Eu2 Eu1 86.886(13) 8_455 8_456 ? 
Ga1 Eu2 Eu1 89.524(12) 3_445 8_456 ? 
Ga1 Eu2 Eu1 157.795(12) 4_545 8_456 ? 
P2 Eu2 Eu1 134.79(3) 8_456 7 ? 
P2 Eu2 Eu1 51.33(3) 7 7 ? 
P2 Eu2 Eu1 123.88(3) 3_445 7 ? 
P2 Eu2 Eu1 111.75(3) 4_545 7 ? 
P1 Eu2 Eu1 59.07(3) . 7 ? 
P1 Eu2 Eu1 54.91(3) 2 7 ? 
Ga1 Eu2 Eu1 86.886(13) 7_556 7 ? 
Ga1 Eu2 Eu1 87.820(13) 8_455 7 ? 
Ga1 Eu2 Eu1 157.795(12) 3_445 7 ? 
Ga1 Eu2 Eu1 89.524(12) 4_545 7 ? 
Eu1 Eu2 Eu1 83.697(13) 8_456 7 ? 
P2 Ga1 P2 101.65(4) . 6_566 ? 
P2 Ga1 P1 116.10(5) . . ? 
P2 Ga1 P1 111.64(5) 6_566 . ? 
P2 Ga1 P1 106.75(5) . 7_556 ? 
P2 Ga1 P1 119.58(5) 6_566 7_556 ? 
P1 Ga1 P1 101.75(5) . 7_556 ? 
P2 Ga1 Eu1 98.46(4) . 4 ? 
P2 Ga1 Eu1 59.13(3) 6_566 4 ? 
P1 Ga1 Eu1 60.56(4) . 4 ? 
P1 Ga1 Eu1 154.07(4) 7_556 4 ? 
P2 Ga1 Eu2 113.44(4) . 7_556 ? 
P2 Ga1 Eu2 58.79(4) 6_566 7_556 ? 
P1 Ga1 Eu2 130.41(4) . 7_556 ? 
P1 Ga1 Eu2 61.12(4) 7_556 7_556 ? 
Eu1 Ga1 Eu2 114.051(18) 4 7_556 ? 
P2 Ga1 Eu2 55.21(4) . 3 ? 
P2 Ga1 Eu2 53.58(3) 6_566 3 ? 
P1 Ga1 Eu2 152.46(4) . 3 ? 
P1 Ga1 Eu2 105.79(4) 7_556 3 ? 
Eu1 Ga1 Eu2 93.388(16) 4 3 ? 
Eu2 Ga1 Eu2 65.960(13) 7_556 3 ? 
P2 Ga1 Eu1 52.60(4) . . ? 
P2 Ga1 Eu1 143.69(4) 6_566 . ? 
P1 Ga1 Eu1 103.46(4) . . ? 
P1 Ga1 Eu1 59.19(3) 7_556 . ? 
Eu1 Ga1 Eu1 139.41(2) 4 . ? 
Eu2 Ga1 Eu1 104.419(17) 7_556 . ? 
Eu2 Ga1 Eu1 90.629(16) 3 . ? 
P2 Ga1 Eu1 53.39(4) . 7 ? 
P2 Ga1 Eu1 120.35(4) 6_566 7 ? 
P1 Ga1 Eu1 62.74(3) . 7 ? 
P1 Ga1 Eu1 119.50(4) 7_556 7 ? 
Eu1 Ga1 Eu1 71.441(13) 4 7 ? 
Eu2 Ga1 Eu1 166.83(2) 7_556 7 ? 
Eu2 Ga1 Eu1 102.451(17) 3 7 ? 
Eu1 Ga1 Eu1 68.263(14) . 7 ? 
Ga1 P1 Ga1 78.25(5) . 7_556 ? 
Ga1 P1 Eu1 75.69(4) . 4 ? 
Ga1 P1 Eu1 147.03(6) 7_556 4 ? 
Ga1 P1 Eu2 123.77(5) . . ? 
Ga1 P1 Eu2 75.30(4) 7_556 . ? 
Eu1 P1 Eu2 136.74(5) 4 . ? 
Ga1 P1 Eu1 158.33(6) . 8_456 ? 
Ga1 P1 Eu1 122.54(5) 7_556 8_456 ? 
Eu1 P1 Eu1 82.72(3) 4 8_456 ? 
Eu2 P1 Eu1 71.91(3) . 8_456 ? 
Ga1 P1 Eu1 96.48(4) . 7_556 ? 
Ga1 P1 Eu1 80.25(4) 7_556 7_556 ? 
Eu1 P1 Eu1 82.97(3) 4 7_556 ? 
Eu2 P1 Eu1 125.89(5) . 7_556 ? 
Eu1 P1 Eu1 82.53(3) 8_456 7_556 ? 
Ga1 P1 Eu1 77.65(4) . 7 ? 
Ga1 P1 Eu1 113.27(5) 7_556 7 ? 
Eu1 P1 Eu1 80.40(3) 4 7 ? 
Eu2 P1 Eu1 69.06(3) . 7 ? 
Eu1 P1 Eu1 97.12(4) 8_456 7 ? 
Eu1 P1 Eu1 163.27(5) 7_556 7 ? 
Ga1 P2 Ga1 118.21(6) . 6_565 ? 
Ga1 P2 Eu2 148.74(6) . 7 ? 
Ga1 P2 Eu2 85.41(4) 6_565 7 ? 
Ga1 P2 Eu1 87.63(4) . . ? 
Ga1 P2 Eu1 149.72(6) 6_565 . ? 
Eu2 P2 Eu1 77.70(3) 7 . ? 
Ga1 P2 Eu1 87.06(4) . 7 ? 
Ga1 P2 Eu1 77.56(4) 6_565 7 ? 
Eu2 P2 Eu1 119.70(5) 7 7 ? 
Eu1 P2 Eu1 89.15(4) . 7 ? 
Ga1 P2 Eu2 84.25(4) . 3 ? 
Ga1 P2 Eu2 78.19(4) 6_565 3 ? 
Eu2 P2 Eu2 80.92(3) 7 3 ? 
Eu1 P2 Eu2 122.74(5) . 3 ? 
Eu1 P2 Eu2 146.39(5) 7 3 ? 
 
_diffrn_measured_fraction_theta_max    0.998 
_diffrn_reflns_theta_full              27.50 
_diffrn_measured_fraction_theta_full   0.998 
_refine_diff_density_max    1.528 
_refine_diff_density_min   -1.401 
_refine_diff_density_rms    0.300 


_iucr_refine_instructions_details
;

TITL n090114a_C2_c in C2/c
CELL 0.71073  13.0245  10.1167   6.5580  90.000  90.243  90.000
ZERR    4.00   0.0012   0.0010   0.0006   0.000   0.001   0.000
LATT  7
SYMM -X, Y, 0.5-Z
SFAC P GA EU
UNIT 16 8 12
TEMP -183
SIZE 0.023 0.049 0.062
OMIT -3 55.00
L.S. 19
BOND
FMAP 2
PLAN 20
ACTA
 
WGHT    0.038000    1.106500
EXTI    0.000359
FVAR       0.03909
EU1   3    0.377925    0.127763    0.036143    11.00000    0.00626    0.00613 =
         0.00837   -0.00007   -0.00065    0.00011
EU2   3    0.000000    0.100221    0.250000    10.50000    0.00606    0.00686 =
         0.00556    0.00000   -0.00030    0.00000
GA1   2    0.296683    0.378717    0.415749    11.00000    0.00659    0.00597 =
         0.00525   -0.00024   -0.00006   -0.00009
P1    1    0.117266    0.325009    0.475940    11.00000    0.00624    0.00684 =
         0.00697   -0.00026   -0.00097   -0.00011
P2    1    0.343544    0.415305    0.070359    11.00000    0.00594    0.00769 =
         0.00505    0.00021    0.00011    0.00034
HKLF 4
 
REM  n090114a_C2_c in C2/c
REM R1 =  0.0214 for    921 Fo > 4sig(Fo)  and  0.0245 for all   1002 data
REM     43 parameters refined using      0 restraints
 
END  
     
WGHT      0.0380      1.1066 
REM Highest difference peak  1.528,  deepest hole -1.401,  1-sigma level  0.300
Q1    1   0.0374  0.1738  0.2468  11.00000  0.05    1.53
Q2    1   0.0000  0.0174  0.2500  10.50000  0.05    1.50
Q3    1   0.4114  0.0561  0.0412  11.00000  0.05    1.45
Q4    1  -0.0272  0.1130  0.0646  11.00000  0.05    1.11
Q5    1   0.3287  0.0410  0.0066  11.00000  0.05    1.00
Q6    1   0.3006  0.4669  0.4339  11.00000  0.05    0.97
Q7    1   0.0306  0.0928  0.1407  11.00000  0.05    0.95
Q8    1   0.2772  0.3789  0.2398  11.00000  0.05    0.90
Q9    1   0.3908  0.2171  0.0304  11.00000  0.05    0.90
Q10   1   0.2292  0.4000  0.4084  11.00000  0.05    0.89
Q11   1   0.1121  0.4531  0.4991  11.00000  0.05    0.86
Q12   1   0.3991  0.1110 -0.0732  11.00000  0.05    0.83
Q13   1   0.1506  0.2905  0.5412  11.00000  0.05    0.81
Q14   1   0.4114  0.1258  0.2100  11.00000  0.05    0.81
Q15   1   0.3501  0.1179  0.1598  11.00000  0.05    0.81
Q16   1   0.3081  0.2916  0.0317  11.00000  0.05    0.81
Q17   1   0.4594  0.3422  0.2814  11.00000  0.05    0.80
Q18   1   0.2688  0.1201  0.1215  11.00000  0.05    0.80
Q19   1   0.3864  0.4347 -0.0697  11.00000  0.05    0.76
Q20   1   0.0828  0.4375  0.4106  11.00000  0.05    0.75


;
